# Supplementary material for: Synthesis of Sn4P3/reduced graphene oxide nanocomposites as highly efficient electrocatalysts for CO2 reduction
Source: Royal Society of Chemistry journal article supplement (doi:10.1039/d0gc02509g), 2020-01-01
Supplement: d0gc02509g1.pdf [file d0gc02509g1.pdf]

## Electronic Supplementary Information

### Synthesis of Sn<sub>4</sub>P<sub>3</sub>/Reduced Graphene Oxide Nanocomposites as Highly Efficient Electrocatalysts for CO<sub>2</sub> Reduction

Lu Lu,<sup>a,b,c</sup> Weiwei Guo,<sup>a,c</sup> Chunjun Chen<sup>a,c</sup> Qinggong Zhu,<sup>a</sup> Jun Ma,<sup>a</sup> Haihong Wu,<sup>d</sup> Dexin Yang,<sup>a,c</sup>  
Guanying Yang,<sup>a</sup> Xiaofu Sun,<sup>a,c\*</sup> and Buxing Han<sup>a,c,d\*</sup>

<sup>a</sup> Beijing National Laboratory for Molecular Sciences, CAS Key Laboratory of Colloid and Interface and Thermodynamics, CAS Research/Education Center for Excellence in Molecular Sciences, Institute of Chemistry, Chinese Academy of Sciences, Beijing 100190, China

<sup>b</sup> Paris Curie Engineer School, Beijing University of Chemical Technology, Beijing 100029, China

<sup>c</sup> School of Chemistry and Chemical Engineering, University of Chinese Academy of Sciences; Beijing 100049, China.

<sup>d</sup> Shanghai Key Laboratory of Green Chemistry and Chemical Processes, School of Chemistry and Molecular Engineering, East China Normal University, Shanghai 200062, China.

## Experimental Procedures

### Reagents

$\text{SnCl}_2 \cdot 2\text{H}_2\text{O}$  (purity > 99.9%) were provided by Sinopharm Chem. Reagent Co. Ltd. Ethylenediamine (purity > 99%) and  $\text{NaBH}_4$  (A. R. grade) were purchased from Beijing Chemical Company. Red phosphorus (purity > 99%), Toray Carbon Paper (CP, TGP-H-60, 19 × 19 cm), Nafion N-117 membrane (0.180 mm thick,  $\geq 0.90$  meg/g exchange capacity) and Nafion D-521 dispersion (5 % w/w in water and 1-propanol,  $\geq 0.92$  meg/g exchange capacity) were purchased from Alfa Aesar China Co., Ltd. PVP and citric acid (purity > 99%) was purchased from J&K. Graphene oxide (GO) was obtained from Institute of Coal Chemistry, Chinese Academy of Sciences. 1-Butyl-3-methylimidazolium hexafluorophosphate ([Bmim] $\text{PF}_6$ , purity > 99%) was provided by the Centre of Green Chemistry and Catalysis, Lanzhou Institute of Chemical Physics, Chinese Academy of Sciences.

### Synthesis of the $\text{Sn}_4\text{P}_3/\text{RGO}$ nanocomposites

In a typical synthesis of Sn/RGO nanocomposite, PVP (0.1 g) and citric acid (0.1 g) were dissolved in 30 mL de-ionized water under ultrasonication. Then, 10 mL GO suspension ( $4 \text{ mg mL}^{-1}$ ) was added into above solution to form solution A. 20 mL of freshly prepared  $\text{SnCl}_2 \cdot 2\text{H}_2\text{O}$  (0.2 g) under ultrasonication was added into solution A drop by drop under stirring for 1 h. Next, 20 mL of freshly prepared  $\text{NaBH}_4$  (90 mg) aqueous solution was quickly added under the purging of  $\text{N}_2$  as a protecting gas. The color of the solution turned to black immediately. The resulting solution was kept stirring for 1 h. The resultant black products were separated by centrifugation (10000 rpm for 5 min) and washed several times with ultrapure water ( $5 \times 30 \text{ mL}$ ) and ethanol ( $5 \times 30 \text{ mL}$ ) to remove impurities. Finally, Sn/RGO nanocomposite was dried in a vacuum oven at  $60^\circ\text{C}$  for 6 h. 81.1- $\text{Sn}_4\text{P}_3/\text{RGO}$  was obtained by the addition of 1.2 g Sn/RGO and 0.464 g red phosphorus into 60 mL ethylenediamine solution and kept stirring for 12 h. The mixture was transferred into an 80 mL Teflon-lined stainless-steel autoclave and put into the muffle furnace at  $200^\circ\text{C}$  for 40 h. The system was cooled to ambient temperature naturally and washed several times with ultrapure water ( $5 \times 30 \text{ mL}$ ) and ethanol ( $5 \times 30 \text{ mL}$ ), then dried in a vacuum oven at  $60^\circ\text{C}$  for 6 h. The ratio of the Sn/RGO nanocomposites can be controlled by tuning the ratio of  $\text{SnCl}_2 \cdot 2\text{H}_2\text{O}$  and GO. The prepared samples were denoted as 34.2- $\text{Sn}_4\text{P}_3/\text{RGO}$ , 55.2- $\text{Sn}_4\text{P}_3/\text{RGO}$ , 69.9- $\text{Sn}_4\text{P}_3/\text{RGO}$  and 88.3- $\text{Sn}_4\text{P}_3/\text{RGO}$  for 80, 40, 20, 10 mL graphene oxide suspension ( $4 \text{ mg mL}^{-1}$ ).

### Materials characterization

The morphologies of  $\text{Sn}_4\text{P}_3/\text{RGO}$  were characterized by a JEOL-2100F TEM operated at 200 kV. The content of metal in the catalysts was determined by inductively coupled plasma optical emission spectroscopy (ICP-OES, Vista-MPX). X-ray photoelectron spectroscopy (XPS) analysis was performed on the Thermo Scientific ESCA Lab 250Xi using 200 W monochromatic Al K $\alpha$  radiation. The 500  $\mu\text{m}$  X-ray spot was used for the XPS analysis. The base pressure in the analysis chamber was about  $3 \times 10^{-10}$  mbar. Typically, the hydrocarbon C1s line at 284.8 eV from adventitious carbon is used for energy referencing. Powder X-ray diffraction (XRD) patterns were collected on the X-ray diffractometer (Model D/MAX2500, Rigaku) with Cu-K $\alpha$  radiation. Thermogravimetric (TG) measurements were conducted using a TGA4000 analyzer from  $30^\circ\text{C}$  to  $700^\circ\text{C}$  with a heating rate of  $10^\circ\text{C min}^{-1}$  under a  $\text{N}_2$  flow of  $60 \text{ mL min}^{-1}$  with open alumina pans. The Raman spectra of the  $\text{Sn}_4\text{P}_3/\text{RGO}$  samples were obtained at room temperature in flame-sealed capillary on a FT Bruker RFS 106/S spectrometer, equipped with a 514 nm laser, in the region from 4000 to  $100 \text{ cm}^{-1}$  with a resolution of  $2 \text{ cm}^{-1}$ .

### Electrochemical study and product analysis

The electrochemical workstation (CHI 660E, Shanghai CH Instruments Co., China) was used for all CO<sub>2</sub> reduction experiments. Linear sweep voltammetry (LSV) measurements were performed in a single compartment batch cell with a typical three-electrode setup, which contained working electrode (catalyst dropped on carbon paper), a platinum gauze auxiliary electrode, and an Ag/Ag<sup>+</sup> (0.01 M AgNO<sub>3</sub> in 0.1 M TBAP-MeCN) reference electrode. Before electrolysis, the electrolyte was purged with N<sub>2</sub> or CO<sub>2</sub> gas for at least 20 min.

The LSV measurement in gas-saturated electrolyte was conducted at a sweep rate of 20 mV/s in the potential between -1.8 V and -2.6 V (vs. Ag/Ag<sup>+</sup>). Constant magnetic stirring was kept in the process. The electrolysis experiments were conducted at 25 °C in a typical H-type cell which was similar to that used in our previous work.<sup>1</sup> In the experiments, the cathode and anode compartments were separated by a Nafion 117 proton exchange membrane. H<sub>2</sub>SO<sub>4</sub> aqueous solution (0.5 M) was used as anodic electrolyte. H<sup>+</sup> could be transferred from anode compartment to cathode compartment through Nafion 117 proton exchange membrane. Under the continuous stirring, CO<sub>2</sub> flowed through the catholyte for 15 min before electrolysis. Then, potentiostatic electrochemical reduction of CO<sub>2</sub> was carried out with CO<sub>2</sub> bubbling (2 mL/min).

The liquid product was analyzed by <sup>1</sup>H NMR (Bruker Avance III 400 HD spectrometer) in dimethyl sulfoxide-d<sub>6</sub> with TMS as an internal standard. The gaseous product of electrochemical experiments was collected by using a gas bag and analyzed by gas chromatography (GC, HP 4890D).

Electrochemical impedance spectroscopic (EIS) studies were performed in the frequency range from 0.1 to 100,000 Hz and amplitude of 5 mV.

#### **Calculations of Faradaic efficiencies of the gas products:<sup>2</sup>**

FE = moles of products per second / theoretical moles equivalent per second

From the GC peak areas and calibration curves for the TCD detector, we can obtain the V % of H<sub>2</sub>. Since the flow rate of the gas was known, the amount of moles of H<sub>2</sub> (or CO) per second could be calculated. The theoretical moles per second were obtained from current density since production of H<sub>2</sub> (or CO) proceeded via 2-electron paths.

**Table S1.** The CO<sub>2</sub> electrocatalytic reduction over different Sn based electrodes in different electrolytes.

| Electrode/<br>electrocatalysts                                  | Electrode<br>potential / V   | Electrolyte                                 | Product and FE /<br>%         | CD /<br>mA cm <sup>-2</sup> | Ref.         |
|-----------------------------------------------------------------|------------------------------|---------------------------------------------|-------------------------------|-----------------------------|--------------|
| 81.1-Sn <sub>4</sub> P <sub>3</sub> /RGO nanocomposite          | -2.4 V vs Ag/Ag <sup>+</sup> | MeCN contain 0.5<br>M [Bmim]PF <sub>6</sub> | CO / 96.6                     | 68                          | This<br>work |
| Ultrafine nanoscale tin oxide                                   | -1.8 V vs. SCE               | 0.1 M NaHCO <sub>3</sub>                    | formate / 93.6                | >10                         | 3            |
| ultrathin Sn quantum sheets layers<br>confined in graphene      | -1.8 V vs. SCE               | 0.1 M NaHCO <sub>3</sub>                    | formate / 90                  | 21.1                        | 4            |
| Sn/SnS <sub>2</sub> derived from SnS <sub>2</sub><br>nanosheets | -1.4 V vs Ag/AgCl            | 0.5 M NaHCO <sub>3</sub>                    | Formate / 84.5                | 13.9                        | 5            |
| SnO <sub>x</sub>                                                | -0.7 V vs RHE                | 0.5 M NaHCO <sub>3</sub>                    | >85 CO <sub>2</sub> reduction | 1.8                         | 6            |
| Ag-Sn Bimetallic                                                | -0.8 V vs RHE                | 0.5 M NaHCO <sub>3</sub>                    | Formate / 80                  | 16                          | 7            |
| Core/Shell Cu/SnO <sub>2</sub> Structure                        | -0.7 V vs RHE                | 0.5 M KHCO <sub>3</sub>                     | CO 93                         | Not giving                  | 8            |
| SnO Nanoparticles                                               | -0.66 V vs RHE               | 0.5 M KHCO <sub>3</sub>                     | CO 30 -40                     | 13                          | 9            |
| SnO <sub>2</sub> Porous Nanowires                               | -0.8 V vs RHE                | 0.1 M KHCO <sub>3</sub>                     | HCOOH 80                      | 10                          | 10           |
| electrodeposited SnO <sub>2</sub> @N-doped<br>porous carbon     | -2.2 V vs Ag/Ag <sup>+</sup> | MeCN contain 0.5<br>M [Bmim]PF <sub>6</sub> | HCOOH / 94.1                  | 28.4                        | 11           |

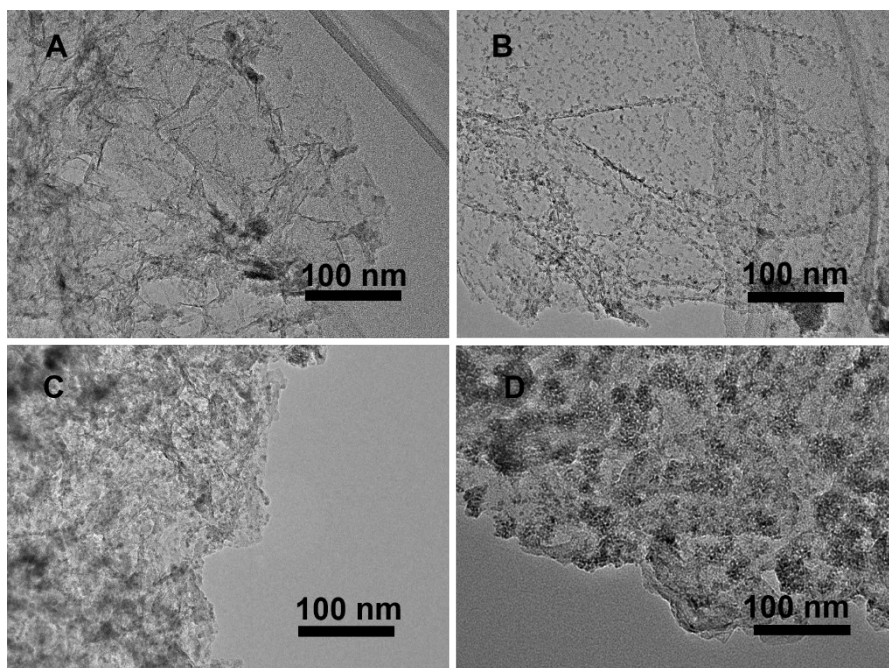

**Figure S1.** TEM images of (A) 34.2-Sn<sub>4</sub>P<sub>3</sub>/RGO, (B) 55.2-Sn<sub>4</sub>P<sub>3</sub>/RGO, (C) 69.9-Sn<sub>4</sub>P<sub>3</sub>/RGO and (D) 88.3-Sn<sub>4</sub>P<sub>3</sub>/RGO.

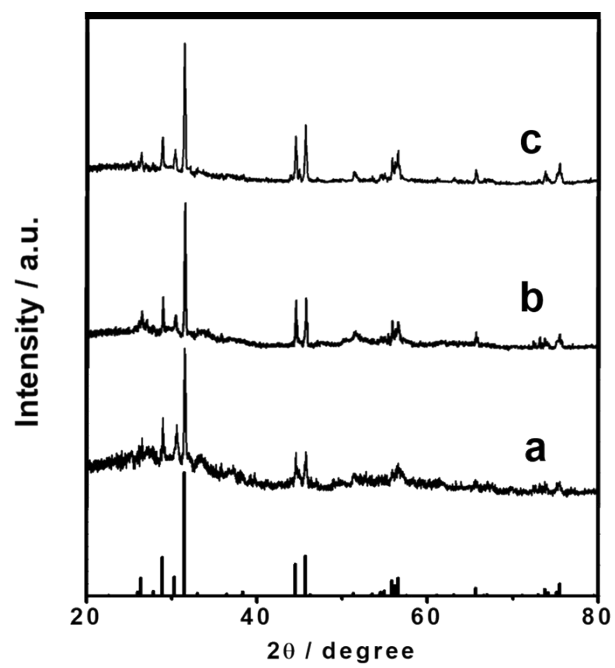

**Figure S2.** XRD patterns of (a) 34.2-Sn<sub>4</sub>P<sub>3</sub>/RGO, (b) 55.2-Sn<sub>4</sub>P<sub>3</sub>/RGO, (c) 69.9-Sn<sub>4</sub>P<sub>3</sub>/RGO.

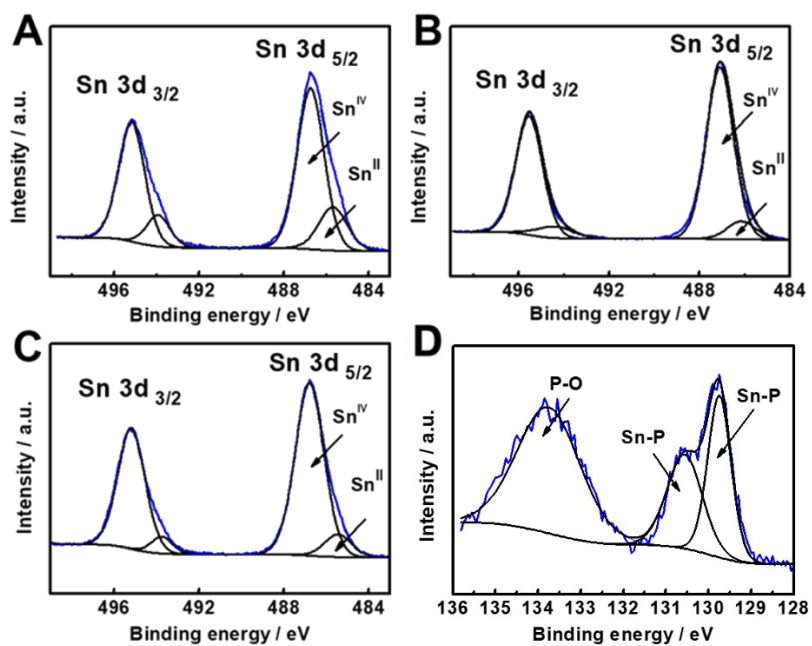

**Figure S3.** XPS spectra of Sn in (A) 34.2-Sn<sub>4</sub>P<sub>3</sub>/RGO, (B) 55.2-Sn<sub>4</sub>P<sub>3</sub>/RGO, (C) 69.9-Sn<sub>4</sub>P<sub>3</sub>/RGO and (D) P in 81.1-Sn<sub>4</sub>P<sub>3</sub>/RGO.

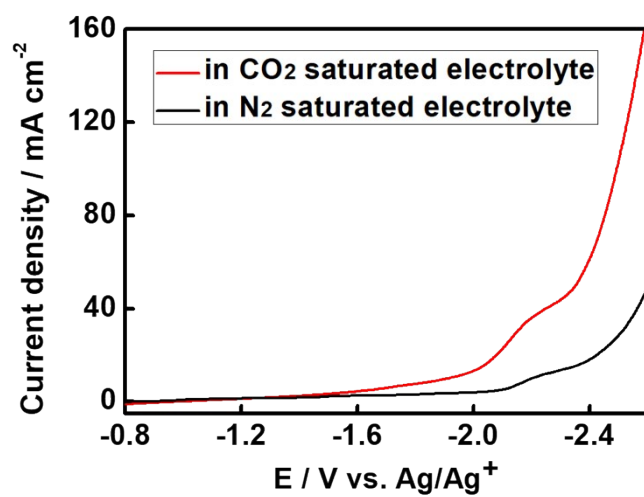

**Figure S4.** LSV curves for 81.1-Sn<sub>4</sub>P<sub>3</sub>/RGO in N<sub>2</sub>-saturated and CO<sub>2</sub>-saturated MeCN containing 0.5 M [Bmim]PF<sub>6</sub>.



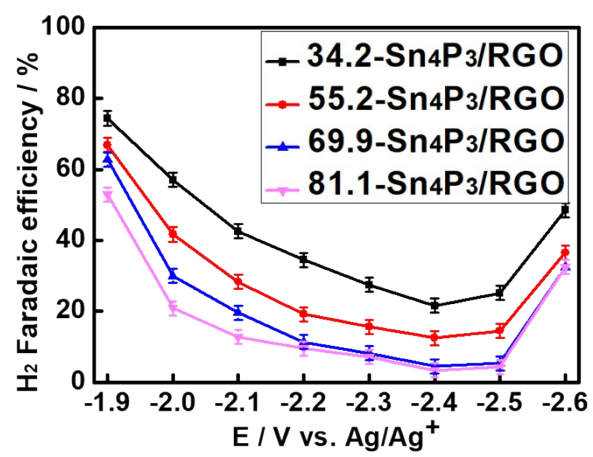

Figure S5. Faradaic efficiency for H<sub>2</sub> over Sn<sub>4</sub>P<sub>3</sub>/RGO samples.

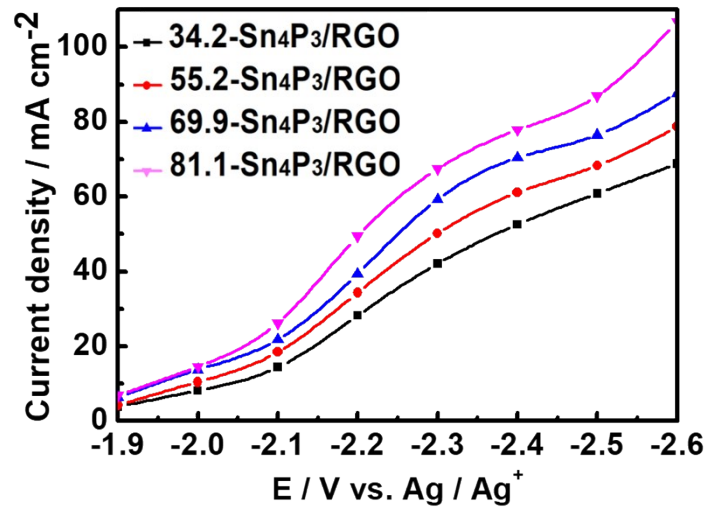

**Figure S6.** The total current density for 34.2-Sn<sub>4</sub>P<sub>3</sub>/RGO, 55.2-Sn<sub>4</sub>P<sub>3</sub>/RGO, 69.9-Sn<sub>4</sub>P<sub>3</sub>/RGO and 81.1-Sn<sub>4</sub>P<sub>3</sub>/RGO electrodes in CO<sub>2</sub>-saturated MeCN containing 0.5 M [Bmim]PF<sub>6</sub> electrolyte at different applied potentials.

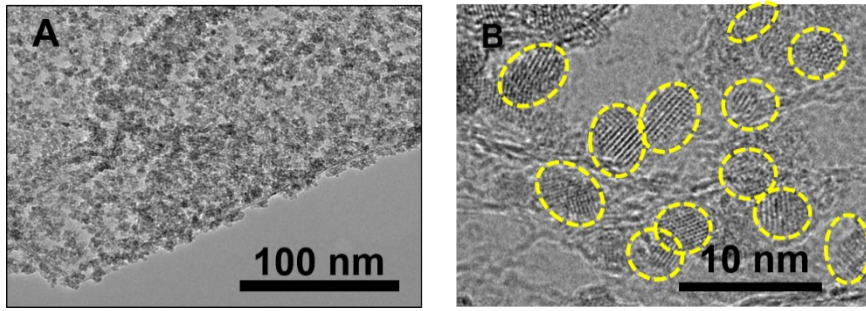

**Figure S7.** (A) TEM and (B) HR-TEM images of 81.1-Sn<sub>4</sub>P<sub>3</sub>/RGO after 12 h electrolysis.

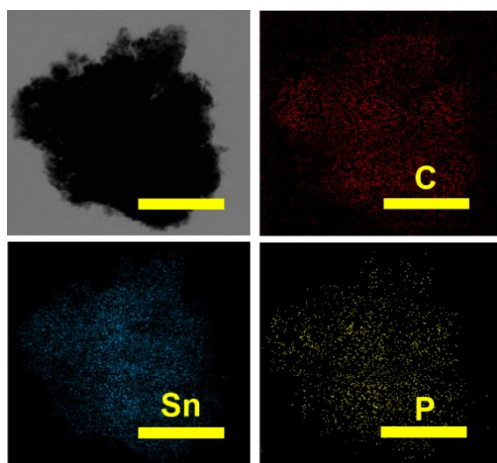

**Figure S8.** EDX mapping images (scale bar: 200 nm) of 81.1-Sn<sub>4</sub>P<sub>3</sub>/RGO after 12 h electrolysis.

## References

1. X. Sun, Q. Zhu, X. Kang, H. Liu, Q. Qian, Z. Zhang and B. Han, *Angew. Chem. Int. Ed.*, 2016, **55**, 6771.
2. C. E. Tornow, M. R. Thorson, S. Ma, A. A. Gewirth and P. J. A. Kenis, *J. Am. Chem. Soc.*, 2012, **134**, 19520.
3. S. Zhang, P. Kang and T. J. Meyer, *J. Am. Chem. Soc.*, 2014, **136**, 1734.
4. F. Lei, W. Liu, Y. Sun, J. Xu, K. Liu, L. Liang, T. Yao, B. Pan, S. Wei and Y. Xie, *Nat. Commun.*, 2016, **7**, 12697.
5. F. Li, L. Chen, M. Xue, T. Williams, Y. Zhang, D. R. MacFarlane and J. Zhang, *Nano Energy*, 2017, **31**, 270.
6. Y. Chen, M. W. Kanan, *J. Am. Chem. Soc.*, 2012, **134**, 1986.
7. W. Luc, C. Collins, S. Wang, H. Xin, K. He, Y. Kang and F. Jiao, *J. Am. Chem. Soc.*, 2017, **139**, 1885.
8. Q. Li, J. Fu, W. Zhu, Z. Chen, B. Shen, L. Wu, Z. Xi, T. Wang, G. Lu, J.-j. Zhu and S. Sun, *J. Am. Chem. Soc.*, 2017, **139**, 4290.
9. J. Gu, F. Héroguel, J. Luterbacher and X. Hu, *Angew. Chem., Int. Ed.*, 2018, **57**, 2943.
10. B. Kumar, V. Atla, J. P. Brian, S. Kumari, T. Q. Nguyen, M. Sunkara and J. M. Spurgeon, *Angew. Chem. Int. Ed.*, 2017, **56**, 3645.
11. L. Lu, X. Sun, J. Ma, Q. Zhu, C. Wu, D. Yang and B. Han. *Sci. China: Chem.*, 2018, **61**, 228.
